# Supplementary material for: Assessing the Performances of Protein Function Prediction Algorithms from the Perspectives of Identification Accuracy and False Discovery Rate
Source: Preprints.org preprint supplement (doi:10.20944/preprints201711.0160.v1), 2017-11-24
Supplement: Supplementary file 1 [file supplementary]

## Sheet: Table1
Table S1 Predictive performance on these SVM, PNN, KNN are given in Sensitivity TP/(TP+FN), Specificity or Recall TN/(TN+FP), Precision TP/(TP + FP), Accuracy (TP+TN)/(TP+FN+TN+FP), and MCC (TP*TN-FP*FN)*(TP*TN-FP*FN)/((TP+FN)*(TP+FP)*(TN+FP)*(TN+FN)).
Uniprot keyword	Protein family	GO Category	BLAST					SVM					PNN					KNN
			Sensitivity (%)	Specificity (%)	Precision (%)	Accuracy (%)	MCC	Sensitivity (%)	Specificity (%)	Precision (%)	Accuracy (%)	MCC	Sensitivity (%)	Specificity (%)	Precision (%)	Accuracy (%)	MCC	Sensitivity (%)	Specificity (%)	Precision (%)	Accuracy (%)	MCC
KW-0820	tRNA-binding proteins	GO:0000049	98.86	98.29	92.42	98.39	0.9	94.12	99.9	90.57	99.84	0.85	-	-	-	-	-	-	-	-	-	-
KW-0694	RNA-binding proteins	GO:0003723	43.98	98.3	97.29	66.74	0.22	97.76	95.98	69.04	96.13	0.65	-	-	-	-	-	-	-	-	-	-
KW-0396	Initiation factor	GO:0003743	96.88	99.92	97.16	99.83	0.94	91.36	99.86	93.02	99.7	0.85	74.21	99.93	95.41	99.43	0.7	77.63	99.65	81.18	99.22	0.62
KW-0251	Elongation factor	GO:0003746	99.51	99.73	92.61	99.73	0.92	97.48	99.97	98.78	99.91	0.96	84.14	99.87	94.01	99.49	0.79	95.84	99.56	83.71	99.47	0.8
KW-0239	DNA-directed DNA polymerase	GO:0003887	87.63	99.76	90.74	99.43	0.79	81.93	98.65	88.45	96.78	0.69	80.2	99.67	66.39	99.51	0.53	51.06	99.39	41.18	98.99	0.21
KW-0240	DNA-directed RNA polymerase	GO:0003899	95.92	99.85	98.53	99.47	0.94	88.95	97.95	93.48	95.72	0.78	-	-	-	-	-	-	-	-	-	-
KW-0267	Excision nuclease	GO:0004518	100	99.97	96.77	99.97	0.97	97.39	99.99	99	99.97	0.96	93.46	99.93	91.37	99.87	0.85	95.75	99.48	58.84	99.45	0.56
KW-0481	Metalloenzyme inhibitor	GO:0004857	78.43	99.99	90.91	99.96	0.71	83.33	99.99	93.75	99.98	0.78	88.89	99.98	80	99.97	0.71	70.73	99.96	63.04	99.93	0.45
KW-0650	Protein phosphatase inhibitor	GO:0004864	79.55	99.99	94.59	99.97	0.75	96	99.99	88.89	99.99	0.85	-	-	-	-	-	64.86	99.99	88.89	99.96	0.58
KW-0297	G protein coupled receptors	GO:0004930	93	99.56	93.92	99.12	0.86	95.62	98.07	94.53	97.43	0.87	94.05	99.9	93.38	99.81	0.88	96.63	98.94	64.11	98.9	0.61
KW-0344	Guanine-nucleotide releasing factor	GO:0005085	74.09	99.72	58.13	99.58	0.43	83.33	99.95	77.38	99.91	0.64	89.74	99.85	55.56	99.83	0.5	93.79	99.18	31.72	99.15	0.29
KW-0343	GTPase activation	GO:0005096	76.06	99.96	93.51	99.77	0.71	92.92	99.94	83.33	99.92	0.77	86.73	99.93	78.4	99.89	0.68	61.84	99.56	42.24	99.36	0.26
KW-0202	Cytokine	GO:0005125	87.78	99.73	76.33	99.62	0.67	91.29	99.93	89.8	99.88	0.82	-	-	-	-	-	70.66	99.85	80	99.61	0.56
KW-0372	Hormone	GO:0005179	92.23	99.88	90.7	99.78	0.83	87.69	99.92	90.68	99.81	0.79	76.88	99.9	87.97	99.7	0.67	69.78	99.83	80.45	99.52	0.56
KW-0468; KW-0544; KW-0416; KW-0842	Structural proteins (Matrix protein,Core protein,Viral occlusion body,Keratin)	GO:0005198	93.3	99.45	89.16	99.16	0.82	98.46	99.19	98.49	98.93	0.95	-	-	-	-	-	-	-	-	-	-
KW-0273	Eye lens protein	GO:0005212	94.74	99.96	82.76	99.95	0.78	98	100	98	99.99	0.96	100	99.95	71.43	99.95	0.71	96.77	99.97	82.19	99.96	0.8
KW-0407	Ion channel	GO:0005216	92.14	99.66	86.71	99.48	0.79	90.58	99.82	87.77	99.68	0.79	-	-	-	-	-	75.77	99.03	57.46	98.63	0.43
KW-0112	Calmodulin-binding	GO:0005516	90.52	99.5	60.22	99.42	0.54	87.2	99.96	90.51	99.9	0.79	82.93	99.93	83.95	99.85	0.69	69.96	99.44	41.6	99.27	0.29
KW-0290	Folate-binding	GO:0005542	97.56	100	97.56	99.99	0.95	96.97	100	98.97	99.99	0.96	94.95	100	98.95	99.98	0.94	94.12	99.86	62.75	99.84	0.59
KW-0176	Collagen	GO:0005581	100	99.98	93.94	99.98	0.94	96.83	99.99	96.83	99.99	0.94	96.83	99.94	74.39	99.94	0.72	84.47	99.98	92.55	99.94	0.78
KW-0235	DNA replication	GO:0006260	90.25	97.32	85.32	96.27	0.73	85.6	96.64	76.77	95.37	0.62	76.78	98.9	77.64	97.85	0.58	59.69	98.5	66.57	96.65	0.38
KW-0233	DNA recombination	GO:0006310	92.07	99.32	95.65	98.3	0.86	85.74	97.38	92.05	94.34	0.72	77.59	98.92	76.95	97.96	0.58	67.46	99.25	80.3	97.87	0.53
KW-0506	mRNA capping	GO:0006370	86.93	99.9	89.86	99.76	0.78	80.77	99.85	79.25	99.72	0.64	82.19	99.97	91.6	99.9	0.75	61.54	99.72	46.83	99.57	0.29
KW-0443	Lipid metabolism	GO:0006629	93.93	99.37	97.98	98.05	0.9	79.5	99.17	66.67	98.77	0.52	72.08	98.5	80.32	96.43	0.55	71.83	97.78	73.92	95.69	0.5
KW-0445	Lipid transport	GO:0006869	83.28	99.41	73.72	99.09	0.61	79.49	99.81	80.52	99.6	0.64	71.51	99.93	82.55	99.8	0.59	59.43	99.79	60.87	99.58	0.36
KW-0878	Amphibian defense peptide	GO:0006952	100	99.84	81.82	99.84	0.82	100	100	75	100	0.75	66.67	99.98	25	99.98	0.17	100	99.98	66.67	99.98	0.67
KW-0611	Plant defense	GO:0006952	66.86	99.76	91.21	98.55	0.6	100	100	75	100	0.75	66.67	99.98	25	99.98	0.17	100	99.98	66.67	99.98	0.67
KW-0395	Inflammatory response	GO:0006954	82.67	99.58	74.7	99.33	0.61	87.5	99.75	73.68	99.65	0.64	75.37	99.69	46.98	99.6	0.35	55.21	99.81	59.22	99.6	0.32
KW-0130	Cell adhesion	GO:0007155	83.71	99.7	93.86	98.86	0.78	85.93	99.11	84.06	98.43	0.71	-	-	-	-	-	-	-	-	-	-
KW-0527	Neuropeptide	GO:0007218	75.97	99.92	76.56	99.83	0.58	86.21	99.93	66.67	99.91	0.57	79.31	99.96	76.67	99.93	0.61	79.75	99.89	60	99.85	0.48
KW-0401	Integrin	GO:0007229	82.86	99.99	87.88	99.97	0.73	90.91	100	95.24	99.99	0.87	86.36	99.93	41.3	99.92	0.36	90.32	99.92	47.46	99.91	0.43
KW-0147	Chitin-binding	GO:0008061	86.96	99.98	89.55	99.96	0.78	92.42	99.9	84.78	99.86	0.78	75.36	99.91	82.81	99.77	0.62	93.63	98.6	29.86	98.57	0.28
KW-0339	Growth factor	GO:0008083	94.05	99.91	90.8	99.86	0.85	88.89	99.92	88.52	99.85	0.79	86.01	99.91	86.72	99.82	0.74	76.74	99.87	81.91	99.7	0.63
KW-0236	DNA replication inhibitor	GO:0008156	88.24	99.97	78.95	99.95	0.7	97.93	99.99	97.93	99.97	0.96	97.11	99.94	91.09	99.92	0.88	93.93	99.89	83.75	99.85	0.79
KW-0358	Heparin-binding	GO:0008201	82.55	99.9	76.88	99.83	0.63	89.13	99.92	73.87	99.89	0.66	90.22	99.86	61.03	99.83	0.55	70.73	99.93	75	99.84	0.53
KW-0382	Hypotensive agent	GO:0008217	66.67	99.99	82.35	99.97	0.55	66.67	100	100	100	0.67	66.67	99.99	33.33	99.99	0.22	87.5	99.99	58.33	99.98	0.51
KW-0444	Lipid synthesis	GO:0008610	95.28	97.78	91.44	97.28	0.84	82.22	99.61	95.07	98.14	0.76	-	-	-	-	-	-	-	-	-	-
KW-0448	Lipopolysaccharide biosynthesis	GO:0009103	91.58	99.73	92.59	99.44	0.84	76.64	99.83	88.98	99.43	0.68	-	-	-	-	-	-	-	-	-	-
KW-0843	Virulent protein	GO:0009405	70.1	99.75	94.79	97.93	0.65	95.38	99.92	96.49	99.82	0.92	70.3	99.92	87.65	99.66	0.61	63.98	99.14	49.15	98.69	0.31
KW-0604	Photosystem II	GO:0009523	97.91	99.68	91.25	99.62	0.89	97.47	99.48	97.07	99.18	0.94	-	-	-	-	-	-	-	-	-	-
KW-0568	Pathogenesis-related protein	GO:0009607	92.86	99.99	88.64	99.98	0.82	96.33	99.98	98.01	99.94	0.94	94.87	99.93	94.17	99.88	0.89	91.26	99.91	91.67	99.81	0.83
KW-0359	Herbicide resistance	GO:0009635	93.1	99.99	97.59	99.94	0.91	95.22	99.86	95.22	99.72	0.9	96.72	99.98	89.39	99.98	0.86	95.16	99.97	85.51	99.97	0.81
KW-0601	Photorespiration	GO:0009853	97.98	99.88	93.46	99.85	0.91	99.7	99.66	99.44	99.67	0.99	95.15	99.96	92.45	99.93	0.88	96.35	99.92	86.83	99.9	0.84
KW-0600	Photoreceptor	GO:0009881	91.41	99.96	95.12	99.88	0.87	92.88	99.62	95.47	99.09	0.88	80.77	99.98	91.3	99.94	0.74	61.17	99.78	41.72	99.68	0.25
KW-0734	Signal transduction inhibitor	GO:0009968	81.25	99.96	78.79	99.93	0.64	84.62	99.91	49.25	99.89	0.42	84.62	99.98	80.49	99.96	0.68	87.04	99.94	65.28	99.92	0.57
KW-0229	DNA integration	GO:0015074	92.83	99.6	79.71	99.49	0.74	86.63	98.07	87.05	96.58	0.72	72.79	99.96	87.61	99.86	0.64	68.92	99.85	63.75	99.74	0.44
KW-0626	Porin	GO:0015288	83.89	99.91	79.11	99.85	0.66	93.9	99.99	93.9	99.97	0.88	87.8	99.98	88.89	99.95	0.78	79.81	99.95	82.18	99.9	0.66
KW-0602	Photosynthesis	GO:0015979	97.47	99.74	97.6	99.52	0.95	93.3	98.06	82.28	97.64	0.75	81.62	99.64	87.88	99.09	0.71	86.21	99.36	81.3	98.94	0.69
KW-0442	Lipid degradation	GO:0016042	88.19	99.35	85.02	98.9	0.74	78.9	99.94	97.4	99.31	0.76	75.08	99.93	89.56	99.73	0.67	64.75	99.77	72.04	99.44	0.46
KW-0533	Nickel-binding	GO:0016151	91.09	99.84	94.58	99.58	0.86	77.61	99.18	70.59	98.64	0.54	-	-	-	-	-	-	-	-	-	-
KW-0148	Chlorophyll	GO:0016168	98.48	99.81	93.73	99.78	0.92	97.35	99.84	97.91	99.67	0.95	-	-	-	-	-	-	-	-	-	-
KW-0049	Antioxidant	GO:0016209	94.68	99.97	93.68	99.94	0.89	89	99.97	89.9	99.94	0.8	86	99.94	78.9	99.9	0.68	69.05	99.92	73.73	99.82	0.51
KW-0156	Chromatin regulator	GO:0016568	82.42	99.8	89.37	99.45	0.73	76.43	99.5	62.86	99.24	0.48	68.24	99.65	68.41	99.3	0.46	59.9	98.99	47.73	98.4	0.28
KW-0731	Sigma factor	GO:0016987	88.42	99.95	80.77	99.92	0.71	87.04	99.98	85.45	99.96	0.74	83.33	99.97	81.82	99.95	0.68	68.33	99.9	50.62	99.85	0.35
KW-0729	SH3-binding	GO:0017124	82.52	99.92	73.91	99.87	0.61	94.12	99.99	95.52	99.98	0.9	-	-	-	-	-	58.16	99.92	65.52	99.82	0.38
KW-0652	Protein synthesis inhibitor	GO:0017148	93.18	99.88	47.67	99.87	0.44	86.06	99.97	92.81	99.91	0.8	81.82	99.93	84.91	99.85	0.69	79.43	99.8	63.18	99.71	0.5
KW-0191	Covalent protein-RNA linkage	GO:0018144	89.09	99.99	90.74	99.97	0.81	96.3	99.96	80	99.96	0.77	90.74	99.99	92.45	99.98	0.84	74.55	99.79	32.54	99.75	0.24
KW-0157	Chromophore	GO:0018298	96.7	98.51	51.77	98.48	0.49	93.83	99.93	93.83	99.87	0.88	86.91	99.87	88.44	99.73	0.77	89.38	99.49	68.2	99.37	0.6
KW-0543	Viral nucleoprotein	GO:0019013	93.44	99.78	73.79	99.74	0.69	89.91	99.95	91.93	99.89	0.83	87.72	99.98	96.15	99.9	0.84	79.06	99.87	77.73	99.74	0.61
KW-0261	Envelope proteins	GO:0019031	84.85	99.49	87.02	98.92	0.73	90	99.5	84.38	99.22	0.75	-	-	-	-	-	-	-	-	-	-
KW-0699	rRNA-binding proteins	GO:0019843	85.32	98.08	97.54	92.07	0.72	94.06	98.68	59.01	98.59	0.55	95.84	98.68	93.56	98.2	0.88	96.49	98.29	91.42	98.01	0.86
KW-0168	Coat proteins	GO:0030117	87.78	99.35	50.64	99.27	0.44	84.77	99.41	85.2	98.85	0.71	-	-	-	-	-	-	-	-	-	-
KW-0226	DNA condensation	GO:0030261	87.38	99.7	81.08	99.52	0.7	87.64	99.45	80.41	99.16	0.7	69.83	99.89	66.39	99.79	0.46	83.21	99.9	72.67	99.84	0.6
KW-0646	Protease inhibitor	GO:0030414	87.81	99.95	96.04	99.78	0.84	79.79	99.93	85.23	99.83	0.68	75.53	99.57	47.18	99.44	0.35	66.79	99.73	63.39	99.49	0.42
KW-0630	Potassium-binding	GO:0030955	95.78	99.33	93.16	99.02	0.88	90.39	99.95	98.69	99.56	0.89	-	-	-	-	-	-	-	-	-	-
KW-0915	Sodium-binding	GO:0031402	94.82	99.3	87.82	99.07	0.82	90.91	99.86	97.39	99.37	0.88	-	-	-	-	-	-	-	-	-	-
KW-0847	Vitamin C binding	GO:0031418	94.21	99.96	89.76	99.95	0.85	91.89	100	100	99.99	0.92	97.3	99.89	47.37	99.89	0.46	81.63	99.94	61.54	99.91	0.5
KW-0399	Innate immunity	GO:0045087	80.43	99.7	89.37	99.13	0.71	89.66	99.9	86.67	99.82	0.78	65.52	99.93	85.88	99.71	0.56	84.64	99.24	49.74	99.12	0.42
KW-0758	Storage protein	GO:0045735	82.46	99.93	79.66	99.88	0.66	50	99.98	40	99.97	0.2	-	-	-	-	-	63.64	99.88	22.95	99.86	0.15
KW-0838	Vasoactive	GO:0050880	85.71	99.92	61.54	99.9	0.53	94.96	99.99	97.41	99.98	0.92	93.28	99.95	86.05	99.93	0.8	86.23	99.96	88.15	99.91	0.76
KW-0170	Cobalt-binding	GO:0050897	91.89	99.59	90.62	99.27	0.83	81.63	99.91	98.09	98.93	0.79	-	-	-	-	-	-	-	-	-	-
KW-0117	Actin capping	GO:0051693	94.55	99.99	91.23	99.98	0.86	95.1	99.98	93.27	99.97	0.89	91.18	99.9	70.99	99.87	0.65	73.33	99.93	55	99.9	0.4
KW-0497	Mitogen	GO:0051781	83.87	99.98	90.7	99.94	0.76	92.74	99.93	93.24	99.86	0.86	83.6	99.92	91.2	99.75	0.76	85.19	99.77	79.59	99.62	0.67
KW-0449	Lipoprotein	GO:0055097; GO:0055096	85.21	99.53	97.75	96.76	0.8	90.59	98.54	94.88	96.71	0.82	-	-	-	-	-	-	-	-	-	-
KW-0195	Cyclin	GO:0061575	89.34	99.93	80.74	99.89	0.72	97.96	99.98	88.89	99.98	0.87	89.8	99.94	66.67	99.93	0.6	74.74	99.84	52.21	99.78	0.39
KW-0505	Motor protein	GO:0098840	93.38	99.97	95.92	99.91	0.89	89.47	99.97	91.07	99.94	0.81	80.7	99.95	82.88	99.89	0.67	64.32	99.46	39.03	99.27	0.25
KW-0515	Mutator protein	GO:1990633	97.65	99.93	76.85	99.93	0.75	83.82	100	98.28	99.97	0.82	77.94	99.91	62.35	99.87	0.49	70	99.95	73.13	99.9	0.51
KW-0500	Molybdenum binding	-	87.88	99.56	51.79	99.5	0.45	84.3	99.98	92.73	99.93	0.78	-	-	-	-	-	70.83	99.66	43.22	99.56	0.3
KW-0868	Chloride binding	-	86.89	99.9	81.96	99.84	0.71	92	99.98	92	99.96	0.85	-	-	-	-	-	71.64	99.85	62.34	99.76	0.44
KW-0704	Schiff base binding	-	98.59	99.79	93.02	99.75	0.91	93.2	99.86	93.56	99.73	0.87	-	-	-	-	-	73.3	99.7	83.4	99.17	0.6
KW-0711	Selenium binding	-	94.35	99.64	46.8	99.62	0.44	91.84	99.99	96.77	99.97	0.89	-	-	-	-	-	74	99.95	78.72	99.88	0.58
KW-0494	Milk protein	-	93.62	99.9	55	99.89	0.51	92.16	100	97.92	99.99	0.9	-	-	-	-	-	74.07	99.98	86.96	99.95	0.64
KW-0020	Allergen	-	76.32	99.95	89.69	99.8	0.68	85.19	99.88	60.53	99.84	0.51	86.42	99.92	69.31	99.89	0.6	74.11	99.95	79.81	99.87	0.59
KW-0786	Thiamine pyrophosphate binding	-	97.08	99.95	96	99.92	0.93	96.53	99.94	93.58	99.91	0.9	87.7	99.85	83.73	99.75	0.73	74.64	99.44	53.85	99.22	0.4
KW-0104	Cadmium binding	-	87.5	99.98	85.37	99.97	0.75	80	99.99	80	99.99	0.64	-	-	-	-	-	75	99.98	66.67	99.97	0.5
KW-0514	Muscle protein	-	94.22	99.96	94.22	99.93	0.89	95.38	99.96	90.51	99.95	0.86	89.23	99.91	77.33	99.87	0.69	79.77	99.89	76.67	99.81	0.61
KW-0730	Sialic acid binding	-	73.33	99.99	91.67	99.96	0.67	76.19	100	94.12	99.98	0.72	90.48	99.9	35.19	99.9	0.32	81.82	99.96	64.29	99.95	0.53
KW-0140	cGMP binding	-	90	99.89	52.33	99.88	0.47	98.46	100	98.46	99.99	0.97	-	-	-	-	-	82.19	99.79	41.96	99.76	0.34
KW-0092	Biotin binding	-	90.91	99.96	71.43	99.95	0.65	77.78	99.99	73.68	99.98	0.57	-	-	-	-	-	83.33	99.71	17.86	99.7	0.15
KW-0114	cAMP binding	-	80.43	99.97	86.05	99.92	0.69	97.29	99.97	98.55	99.92	0.96	-	-	-	-	-	85.6	99.75	86.19	99.5	0.73
KW-0830	Ubiquinone binding	-	98.37	99.61	93.04	99.54	0.91	94.07	99.93	97.41	99.76	0.91	82.58	99.67	88.13	99.19	0.72	91.5	99.32	79.16	99.1	0.72
KW-0941	Suppressor of RNA silencing	-	84.21	99.97	86.49	99.94	0.73	95.4	99.98	98.57	99.93	0.94	91.03	100	99.75	99.89	0.91	93.05	99.03	51.94	98.96	0.48
KW-0618	Plastoquinone binding	-	99.47	99.88	92.62	99.87	0.92	96.7	99.98	98.65	99.94	0.95	-	-	-	-	-	93.46	99.76	82.03	99.69	0.76
