# Supplementary material for: Assessing the Performances of Protein Function Prediction Algorithms from the Perspectives of Identification Accuracy and False Discovery Rate
Source: Preprints.org preprint supplement (doi:10.20944/preprints201711.0160.v1), 2017-11-24
Supplement: Supplementary file 3 [file Table S2.xlsx]

## Sheet: Sheet1
	Tabel S2. Full list of the protein functional families covered by SVMProt and the prediction percentage of the SVM, kNN, PNN and BLAST models on the four species' genome.
	keywords	Protein Family	Human					A.thanalina					Tuberculosis					Yeast
			Uniprot (%)	SVM(%)	BLAST E=0.001 (%)	PNN(%)	KNN(%)	Uniprot (%)	SVM(%)	BLAST E=0.001 (%)	PNN(%)	KNN(%)	Uniprot (%)	SVM(%)	BLAST E=0.001 (%)	PNN(%)	KNN(%)	Uniprot (%)	SVM(%)	BLAST E=0.001 (%)	PNN(%)	KNN(%)
	KW-0020	Allergen	0.02	0.18	3.68	0.11	0.04	0.01	0.17	6.22	0.07	0.09	0	0	1.66	-	-	1.9	3.14	1.84	0.33	0.8
	KW-0049	Antioxidant	0.07	0.09	0.5	0.08	0.07	0.09	0.16	1.11	0.12	0.13	0.42	0.28	0.69	0.28	0.09	0	0.03	0.25	-	-
	KW-0092	Biotin	0.03	0.04	0.11	0.03	0.03	0.04	0.05	0.11	0.05	0.05	0.09	0.09	0.46	0.09	0.09	0	0.03	0.24	0.03	-
	KW-0104	Cadmium	0.04	0.05	0.46	0.05	0.05	0.09	0.05	2.09	0.05	0.05	0.05	0.05	1.99	0.05	-	0	0.03	0.48	0.01	0.01
	KW-0112	Calmodulin-binding	0.75	0.94	10.94	0.78	0.84	0.71	0.81	10.51	0.71	0.74	0	0	2.12	-	-	0.07	0.07	5.01	0.07	0.07
	KW-0114	cAMP	0.18	0.23	1.89	0.18	0.18	0.13	0.16	1.6	0.13	0.14	0.09	0.23	0.97	0.09	0.14	0.01	0.03	1.47	0.01	0.01
	KW-0117	Actin capping	0.09	0.12	0.72	0.1	0.1	0.05	0.07	0.11	0.05	0.05	0	0	0	-	-	0.01	0.1	0.12	0.01	0.03
	KW-0130	Cell adhesion	2.39	4.85	14.85	0.23	0.47	0.03	1.16	4.49	0.01	0.02	0.14	0.51	1.85	-	-	0.62	1.74	3.99	0.3	0.37
	KW-0140	cGMP	0.1	0.13	1.2	0.11	0.12	0.13	0.15	0.62	0.14	0.14	0	0	0.65	-	-	0.04	0.04	0.71	0.04	-
	KW-0147	Chitin-binding	0.02	0.16	0.36	0.02	0.1	0.08	0.24	3.57	0.08	0.18	0	0	0.05	-	-	0.74	0.04	0.09	-	-
	KW-0148	Chlorophyll	0	0.2	0	-	-	0.17	0.4	0.19	-	-	0	0.37	0.05	-	-	0.01	0.09	0	0.01	0.04
	KW-0156	Chromatin regulator	1.41	2.67	13.63	1.51	1.95	1.09	1.81	6.47	1.03	1.23	0	0	0.74	-	-	0	0.12	6.77	-	-
	KW-0157	Chromophore	0.07	0.15	2.1	0.07	0.1	0.28	0.38	0.88	0.23	0.3	0	0.05	0.78	-	-	0	0.06	0.61	-	0.03
	KW-0168	Coat proteins	0.25	0.82	3.69	-	0.09	0.2	0.7	1.44	-	0.09	0	0.65	0	-	0.05	0.4	2.02	1.37	-	-
	KW-0170	Cobalt-binding	0.07	0.41	1.31	-	-	0.1	0.35	1.69	-	-	0.37	2.12	4.11	-	-	0.39	0.71	1.55	-	-
	KW-0176	Collagen	0.42	0.45	2.07	0.43	0.43	0	0.01	0.32	-	-	0	0	0.37	-	-	0	0	0.3	-	-
	KW-0191	Covalent protein-RNA linkage	0	0	0.06	-	-	0	0.01	0.11	-	0.01	0	0	0	-	-	0	0.01	0.06	-	-
	KW-0195	Cyclin	0.16	0.24	0.4	0.18	0.19	0.33	0.36	0.61	0.34	0.34	0	0	0	-	-	0.03	0.06	0.54	0.03	0.03
	KW-0202	Cytokine	0.92	1.18	2.02	0.95	0.84	0	0.05	0.05	-	-	0	0	0.05	-	-	0	0	0.04	-	-
	KW-0226	DNA condensation	0.07	2.25	0.47	-	-	0.03	1.82	0.25	-	-	0.05	0.28	0.09	-	-	0.18	0.46	0.21	-	-
	KW-0229	DNA integration	0.04	0.16	0.33	-	-	0	0.04	0.05	-	-	0.14	0.28	0.32	-	-	0.06	0.12	1.52	0.06	0.01
	KW-0233	DNA recombination	0.42	1.47	3.08	-	-	0.32	0.98	2.02	-	-	0.83	3.14	1.89	-	-	0.27	0.7	4.15	-	-
	KW-0235	DNA replication	0.48	4.12	3.84	-	-	0.42	3.5	3.14	-	-	1.11	3.23	2.49	-	-	0	0.65	3.3	-	0.01
	KW-0236	DNA replication inhibitor	0.01	0.03	0.08	0.01	0.01	0	0.03	0.09	-	-	0	0.05	0.09	-	-	1.52	2.38	0.1	1.93	1.43
	KW-0239	DNA-directed DNA polymerase	0.1	0.48	0.57	-	-	0.08	0.26	0.55	-	-	0.37	0.6	0.88	-	-	0.12	0.18	2.07	0.12	0.04
	KW-0240	DNA-directed RNA polymerase	0.19	0.49	0.25	-	-	0.23	0.5	0.38	-	-	0.23	0.78	0.23	-	-	0.13	0.34	0.54	-	-
	KW-0251	Elongation factor	0.08	0.11	0.45	0.08	0.09	0.15	0.19	0.48	0.14	0.16	0.18	0.18	0.37	0.18	0.18	4	5.52	0.45	4.94	3.69
	KW-0261	Envelope proteins	0.1	0.46	0.39	0.02	0.03	0	1.04	0.01	0.01	0.04	0	0	0	-	-	0.01	0.01	0.01	0.01	-
	KW-0267	Excision nuclease	0	0	0.06	-	-	0.01	0.01	0.06	0.01	0.01	0.14	0.23	0.28	0.14	0.23	0.24	3.91	0.1	-	-
	KW-0273	Eye lens protein	0.08	0.12	0.89	0.12	0.12	0	0	0.44	-	-	0	0	0.6	-	-	0	0	0.52	-	-
	KW-0290	Folate-binding	0.04	0.04	0.07	0.04	0.04	0	0.01	0.02	-	0.01	0	0	0	-	-	0.18	2.77	0.01	0.13	1.15
	KW-0297	G protein coupled receptors	4.11	6.58	6.78	-	-	0.01	1.97	0.45	-	-	0	0.51	0	-	-	0.03	0.19	0.09	-	-
	KW-0339	Growth factor	0.65	0.93	2.5	0.71	0.73	0.12	0.18	0.24	0.13	0.14	0	0	0.09	-	-	0.01	0.03	0.07	-	-
	KW-0343	GTPase activation	0.97	1.19	5.47	0.93	1.02	0.28	0.24	1.36	0.21	0.23	0	0	0.09	-	-	0.15	3.32	1.67	0.09	2.11
	KW-0344	Guanine-nucleotide releasing factor	0.73	0.86	5.37	0.73	0.75	0.18	0.2	2.12	0.17	0.19	0	0	0.28	-	-	0.04	0.04	1.53	0.04	0.01
	KW-0358	Heparin-binding	0.44	0.67	6.28	0.51	0.49	0	0.01	0.49	-	0.01	0.05	0.05	0.18	0.05	-	0.1	0.1	0.3	0.1	0.04
	KW-0359	Herbicide resistance	0	0.04	0.21	-	-	0.03	0.11	0.67	-	-	0	0.09	0.69	-	-	0	0	0.28	-	-
	KW-0372	Hormone	0.46	0.95	2.44	0.55	0.58	0.25	0.58	1.01	0.24	0.4	0	0	0.05	-	-	0	0.07	0.33	0.03	0.04
	KW-0382	Hypotensive agent	0.01	0.04	0.61	0.03	0.01	0	0	0.01	-	-	0	0	0	-	-	0	0	0	-	-
	KW-0395	Inflammatory response	0.74	0.9	9.65	-	-	0	0.62	1.67	-	-	0	0.14	0.42	-	-	0.09	0.1	1.68	0.09	0.1
	KW-0396	Initiation factor	0.24	0.39	1.7	0.26	0.25	0.26	0.38	1.71	0.24	0.28	0.14	0.18	0.42	0.14	0.14	0	3.87	2.08	-	-
	KW-0399	Innate immunity	1.27	0.52	16.52	-	-	0.26	0.5	9.73	-	-	0	0.28	0.78	-	-	0	0.01	5.04	-	-
	KW-0401	Integrin	0.13	0.14	0.59	0.13	0.13	0	0	0.07	-	-	0	0	0	-	-	0	0	0.03	-	-
	KW-0407	Ion channel	1.73	2.2	5.89	1.73	1.86	0.77	1.21	3.93	0.81	1	0.05	0.09	0.92	0.05	0.09	1.38	4.7	2.51	-	-
	KW-0442	Lipid degradation	0.51	0.78	5.13	-	-	1.06	1.44	4.85	-	-	1.15	0.78	6.74	-	-	0	0.25	2.93	-	-
	KW-0443	Lipid metabolism	2.13	2.14	11.59	-	-	3.12	2.52	12.29	-	-	6.05	1.8	16.2	-	-	0.57	0.79	7.78	0.57	0.36
	KW-0444	Lipid synthesis	0.77	1.77	4.51	-	-	1.03	1.96	6.72	-	-	3.05	5.03	10.76	-	-	0	0.79	4.05	-	0.09
	KW-0445	Lipid transport	0.49	0.6	4.21	-	-	0.18	0.22	2.41	-	-	0.37	0.32	2.63	-	-	0.01	0.09	2.41	0.03	0.01
	KW-0448	Lipopolysaccharide biosynthesis	0	0.65	0.22	-	0.02	0.01	0.75	0.69	-	0.01	0	1.2	1.99	-	0.18	0.49	2.1	0.24	-	-
	KW-0449	Lipoprotein	4.05	0.88	24.21	-	-	2.76	0.6	18.62	-	-	2.03	3.6	6.69	-	-	0.51	0.86	10.03	-	-
	KW-0468; KW-0544; KW-0416; KW-0842	Structural proteins (Matrix protein,Core protein,Viral occlusion body,Keratin)	0.99	2.79	1.42	-	-	0.22	1.19	0.27	-	-	0	0.46	0.09	-	-	0	0.19	0.19	-	-
	KW-0481	Metalloenzyme inhibitor	0.05	0.06	0.5	0.06	0.06	0	0	0.01	-	-	0	0	0	-	-	0	0	0	-	-
	KW-0494	Milk protein	0.02	0.04	0.21	0.03	0.03	0	0.03	0	-	0.01	0	0	0	-	-	0	0.01	0	-	-
	KW-0497	Mitogen	0.2	0.65	4.37	0.3	0.35	0	0.07	0.52	0.01	0.02	0	0	0.05	-	-	0	0.01	0.34	-	-
	KW-0500	Molybdenum	0.03	0.06	0.21	0.03	0.04	0.08	0.08	0.62	0.08	0.08	0.37	0.46	0.97	0.37	0.14	0.55	3.09	0.39	0.91	0.76
	KW-0505	Motor protein	0.66	0.75	4.07	0.67	0.67	0.59	0.45	2.14	0.34	0.42	0	0	0.18	-	-	0	0.07	1.65	-	-
	KW-0506	mRNA capping	0.03	0.14	0.11	-	-	0.02	0.17	0.02	-	-	0	0	0	-	-	0.12	0.07	0.1	-	-
	KW-0514	Muscle protein	0.31	0.42	4.35	0.37	0.39	0	0.17	1.26	0.11	0.13	0	0	0.05	-	-	1.09	1.92	0.97	1.16	0.89
	KW-0515	Mutator protein	0.01	0.02	0.05	0.01	0.01	0.01	0.01	0.05	0.01	0.01	0.28	0.28	0.28	0.28	0.05	0	0.01	0.03	0.01	0.01
	KW-0527	Neuropeptide	0.12	0.28	1.04	0.13	0.16	0	0.05	0.01	-	-	0	0	0	-	-	0	0	0.03	-	-
	KW-0533	Nickel-binding	0.01	0.18	0.38	-	-	0.01	0.17	0.78	-	-	0.14	1.34	2.45	-	-	0.09	0.3	0.65	-	-
	KW-0543	Viral nucleoprotein	0	0.05	0.23	-	-	0	0.03	0.05	-	0.01	0	0	0.05	-	-	0	0.01	0.07	-	-
	KW-0568	Pathogenesis-related protein	0	0.08	0.09	0.04	0.05	0.13	0.2	0.91	0.15	0.16	0	0	0	-	-	0	0.04	0.06	0.01	0.03
	KW-0600	Photoreceptor	0.06	1.23	1.84	-	-	0.09	0.25	0.65	-	-	0	0.28	0.55	-	-	0.09	0.12	0.61	0.09	0.07
	KW-0601	Photorespiration	0	0.25	0.09	-	-	0.18	0.44	0.25	-	-	0	0.37	0.51	-	-	0.06	0.24	0.3	-	-
	KW-0602	Photosynthesis	0	0.98	0.27	-	-	0.71	1.98	1.16	-	-	0	3.19	0.92	-	-	0.07	0.52	0.3	-	-
	KW-0604	Photosystem II	0	0.33	0	-	-	0.3	0.98	0.43	-	-	0	0.69	0	-	-	0.04	0.21	0	-	-
	KW-0611	Plant defense	0	1.18	9.28	-	-	5.83	3.69	31.11	-	-	0	0.51	5.08	-	-	0	0.01	6.37	-	-
	KW-0618	Plastoquinone	0	0.05	0.04	-	0.03	0.13	0.16	0.22	0.15	0.15	0	0	0.51	-	-	0	0.04	0.01	0.01	0.01
	KW-0626	Porin	0.02	0.02	0.02	0.02	0.02	0.11	0.11	0.13	0.11	0.11	0.14	0.05	0.18	0.05	-	0	4	0.06	-	0.4
	KW-0630	Potassium-binding	0.64	1.53	4.14	-	-	0.85	0.86	4.3	-	-	0.46	0.55	2.82	-	-	0	0.45	2.59	-	-
	KW-0646	Protease inhibitor	0.61	0.94	2.55	0.69	0.58	0.11	0.39	0.55	0.12	0.19	0.05	0	0.09	-	-	0.65	3.3	0.31	-	-
	KW-0650	Protein phosphatase inhibitor	0.14	0.15	1.36	0.15	0.14	0.09	0.01	0.24	-	-	0	0	0.05	-	-	0	0	0.22	-	-
	KW-0652	Protein synthesis inhibitor	0.03	0.12	0.25	0.03	0.03	0.01	0.11	0.49	0.01	0.03	0	0	0	-	-	0	0.01	0.04	0.01	0.01
	KW-0694	RNA-binding proteins	3.3	5.42	15.38	-	-	4.39	4.18	13.47	-	-	3.05	6.97	7.99	-	-	0.34	1.1	12.25	0.25	0.34
	KW-0699	rRNA-binding proteins	0.12	0.85	1.26	-	-	0.16	1.37	3.01	-	-	1.85	3.23	2.95	-	-	0	0.94	2.43	-	-
	KW-0704	Schiff base	0.05	0.07	0.07	0.05	0.04	0.11	0.13	0.19	0.11	0.11	0.28	0.83	0.37	0.37	0.37	2.32	6.47	0.21	0.62	1.07
	KW-0711	Selenium	0.02	0.03	0.15	0.02	0.02	0.02	0.03	0.17	0.03	0.03	0	0.05	0.32	-	-	0.57	2.92	0.12	0.39	1.34
	KW-0729	SH3-binding	0.31	0.37	4.9	0.34	0.34	0	0	1.21	-	-	0	0	0.09	-	-	0	0	1.67	-	-
	KW-0730	Sialic acid	0.1	0.13	1.64	0.12	0.12	0	0.01	0.05	-	-	0	0	0.05	-	-	0	0	0.03	-	-
	KW-0731	Sigma factor	0	0	0	-	-	0.04	0.05	0.04	0.04	0.04	0.6	0.69	0.6	0.6	0.6	0.03	0.03	0	0.03	0.03
	KW-0734	Signal transduction inhibitor	0.22	0.23	1.22	0.21	0.21	0.01	0.01	0.74	0.01	0.01	0	0	0.05	-	-	0	0.01	0.7	0.01	-
	KW-0758	Storage protein	0	0	0.25	-	-	0.11	0.11	0.56	0.09	0.09	0	0	0	-	-	0	0.03	0.03	0.03	0.03
	KW-0786	Thiamine pyrophosphate binding	0.06	0.07	0.13	0.06	0.06	0.12	0.15	0.28	0.13	0.14	0.55	0.78	0.69	0.55	0.23	0.6	5.46	0.31	0.36	1.68
	KW-0820	tRNA-binding proteins	0.1	0.08	0.53	-	-	0.14	0.12	0.61	-	-	0.6	0.28	1.15	-	-	0.07	0.28	1.16	-	-
	KW-0830	Ubiquinone binding	0.08	0.71	0.12	0.19	0.6	0.13	0.25	0.42	0.17	0.18	0	0.37	0.88	0.05	0.18	1.01	5.74	0.27	-	-
	KW-0838	Vasoactive	0.06	0.14	0.8	0.07	0.07	0	0.01	0.04	-	-	0	0	0.14	-	-	0	0	0	-	-
	KW-0843	Virulence	0	0.23	7.09	-	-	0	0.28	9.11	-	-	5.49	0.42	19.21	-	-	0.16	0.22	8.76	0.16	0.13
	KW-0847	Vitamin C binding	0.1	0.12	0.18	0.1	0.09	0.07	0.11	0.53	0.07	0.08	0	0	0.14	-	-	0	2.93	0.03	-	-
	KW-0868	Chloride	0.35	0.41	1.08	0.36	0.35	0.07	0.16	0.74	0.07	0.12	0	0	0.78	-	-	2.05	4.09	0.33	2.83	2.87
	KW-0878	Amphibian defense peptide	0	0.08	0.12	0.08	-	0	0.04	0.07	0.04	0.04	0	0	0	-	-	0.01	0.01	0.03	0.01	0.01
	KW-0915	Sodium-binding	0.62	1.72	2.83	-	-	0.82	1.24	2.69	-	-	0.05	0.83	1.85	-	-	0	0.65	1.65	-	-
